# Supplementary material for: Understanding the impact of silica nanoparticles in cancer cells through physicochemical and biomolecular characterizations
Source: Royal Society of Chemistry journal article supplement (doi:10.1039/d4ma00084f), 2024-01-01
Supplement: d4ma00084f1.pdf [file d4ma00084f1.pdf]

## Understanding the effects of silica nanoparticles in cancer cells through characterization

*Asia Saorin, Alberto Martinez Serra, German Jose' Paparoni Bruzual, Michele Crozzolin, Vincenzo Lombardi, Michele Back, Pietro Riello, Marco Monopoli, Flavio Rizzolio*

### Contents

|                                                                                                                                                    |    |
|----------------------------------------------------------------------------------------------------------------------------------------------------|----|
| <b>Table S1.</b> Particle size determined by DLS (Dh hydrodynamic diameter and PDI), DCS and surface charge by Z potential of SiNPs in water. .... | 2  |
| <b>Figure S1.</b> Analysis of stability of SiNPs water dispersions. ....                                                                           | 3  |
| <b>Figure S2.</b> DCS analysis of MSNs in water. ....                                                                                              | 4  |
| <b>Table S2.</b> DLS analysis of SiNPs in CCM with and without FBS, PBS and SC. ....                                                               | 5  |
| <b>Figure S3.</b> Analysis of stability of SiNPs dispersions in complex media.....                                                                 | 6  |
| <b>Table S3.</b> DLS analysis of St108 dispersed in different CCM with FBS and as serum free.....                                                  | 7  |
| <b>Figure S4.</b> DLS analysis of St108 samples dispersed in different CCM expressed as intensity plots.....                                       | 8  |
| <b>Figure S5.</b> DLS analysis during time of St108 in Mc Coy's 5A. ....                                                                           | 9  |
| <b>Figure S6.</b> DCS analysis of MSNs in water, FBS- RPMI and SF-RPMI. ....                                                                       | 10 |
| <b>Figure S7.</b> SDS-PAGE analysis of FBS and MSN incubated with McCoy's5A with 10%FBS. ....                                                      | 11 |
| <b>Figure S8.</b> Hemolysis expressed as absorbance value normalized on NPs' surface area ....                                                     | 12 |
| <b>Figure S9.</b> Bar plots of normalized viability values of OVCAR-3 ....                                                                         | 13 |
| <b>Figure S10.</b> Bar plots of normalized viability values of A549 ....                                                                           | 14 |
| <b>Figure S11.</b> Bar plots of normalized viability values of HCT116 ....                                                                         | 15 |
| <b>Figure S12.</b> Bar plots of normalized viability values of MRC-5 ....                                                                          | 16 |
| <b>Figure S13.</b> Bar plots of normalized viability values of OVCAR-3 ....                                                                        | 17 |
| <b>Figure S14.</b> Bar plots of normalized viability values of A549 ....                                                                           | 18 |
| <b>Figure S15.</b> Bar plots of normalized viability values of HCT116 ....                                                                         | 19 |
| <b>Figure S16.</b> Bar plots of normalized viability values of MRC5. ....                                                                          | 20 |
| <b>Figure S17.</b> Bar plots of normalized viability values of HCT116 ....                                                                         | 21 |
| <b>Figure S18.</b> Images of particles aggregation on MRC-5. ....                                                                                  | 22 |
| <b>Table S4.</b> Inorganic salts compositions of CCM. ....                                                                                         | 23 |

**Table S1.** Particle size determined by DLS (Dh hydrodynamic diameter and PDI), DCS and surface charge by Z potential of SiNPs in water.

| sample       | DLS                 |       | Z pot<br>(mV) | DCS   |
|--------------|---------------------|-------|---------------|-------|
|              | D <sub>h</sub> (nm) | PDI   |               | d(nm) |
| <b>St186</b> | 229                 | 0.086 | -49           | 194   |
| <b>St108</b> | 136                 | 0.018 | -47           | 126   |
| <b>St65</b>  | 85                  | 0.105 | -44           | 69    |
| <b>St21</b>  | 43                  | 0.253 | -24           | 24    |

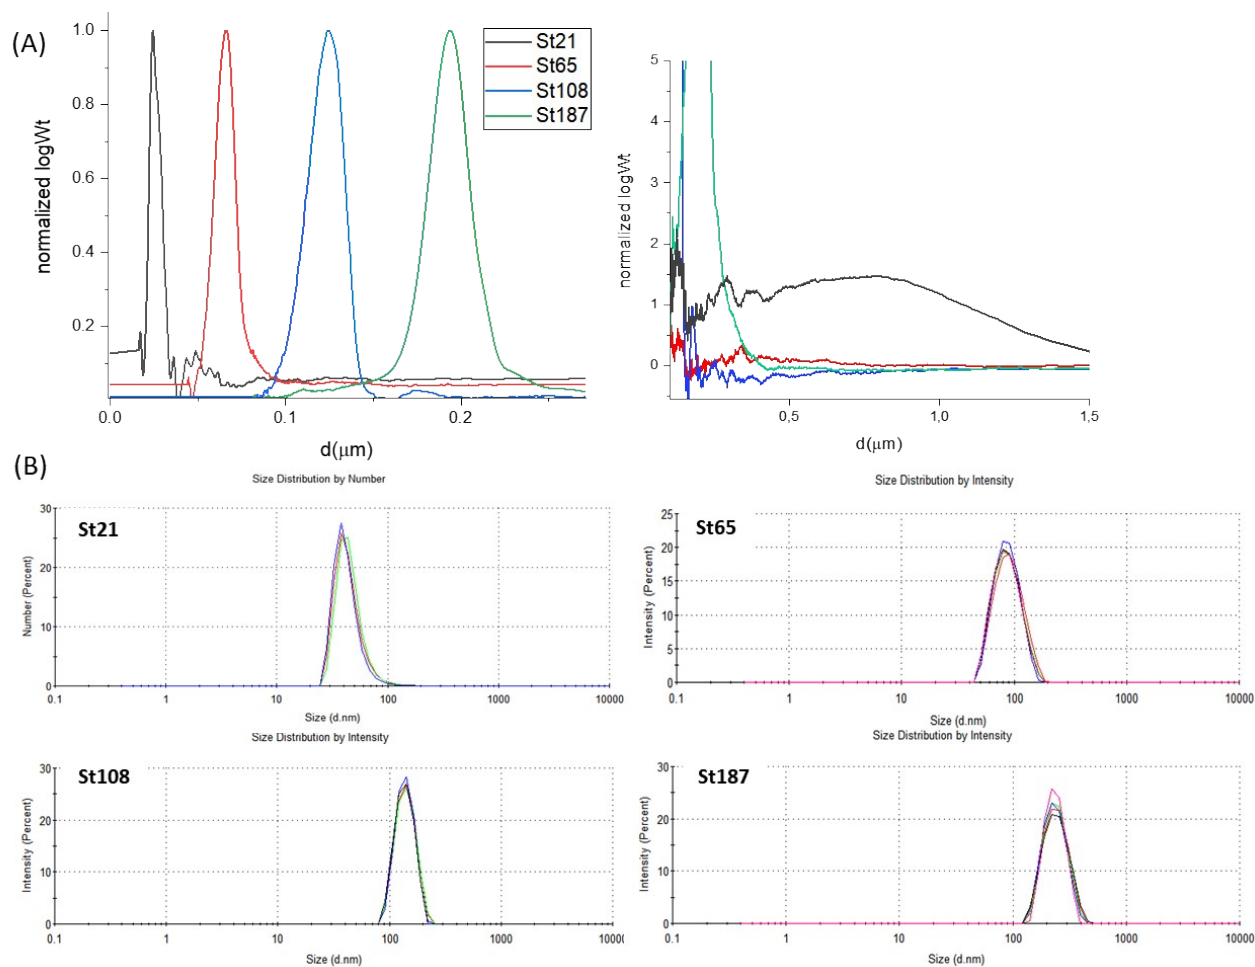

**Figure S1.** Analysis of stability of SiNPs water dispersions. (A) DCS analysis, on the right magnification showing aggregation of sample St21; (B) DLS intensity plots of St65, St108 and St187, while in the case of St21 the plot corresponds to the intensity by number.

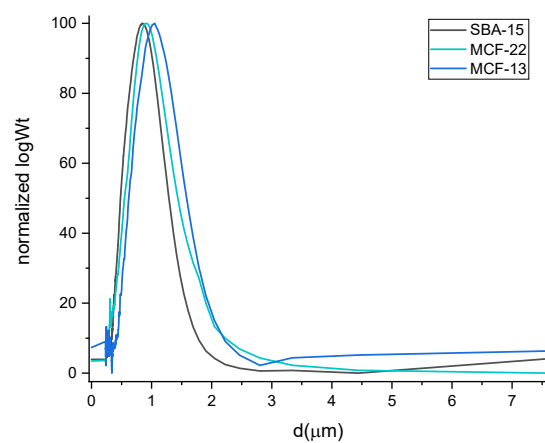

*Figure S2. DCS analysis of MSNs in water.*

**Table S2.** DLS analysis of SiNPs in CCM with and without FBS, PBS and SC.

| sample       | FBS-RPMI            |      | SF-RPMI             |      | SC                  |      |       | PBS                 |      |       |
|--------------|---------------------|------|---------------------|------|---------------------|------|-------|---------------------|------|-------|
|              | D <sub>h</sub> (nm) | PDI  | D <sub>h</sub> (nm) | PDI  | D <sub>h</sub> (nm) | PDI  | ZP mV | D <sub>h</sub> (nm) | PDI  | ZP mV |
| <b>St65</b>  | 308                 | 0.09 | 772                 | 0.63 | 278                 | 0.18 | -7    | 404                 | 0.3  | -19   |
| <b>St108</b> | 202                 | 0.11 | 160                 | 0.21 | 192                 | 0.13 | -4    | 139                 | 0.14 | -17   |
| <b>St187</b> | 170                 | 0.15 | 100                 | 0.17 | 161                 | 0.17 | -5    | 114                 | 0.17 | -17   |

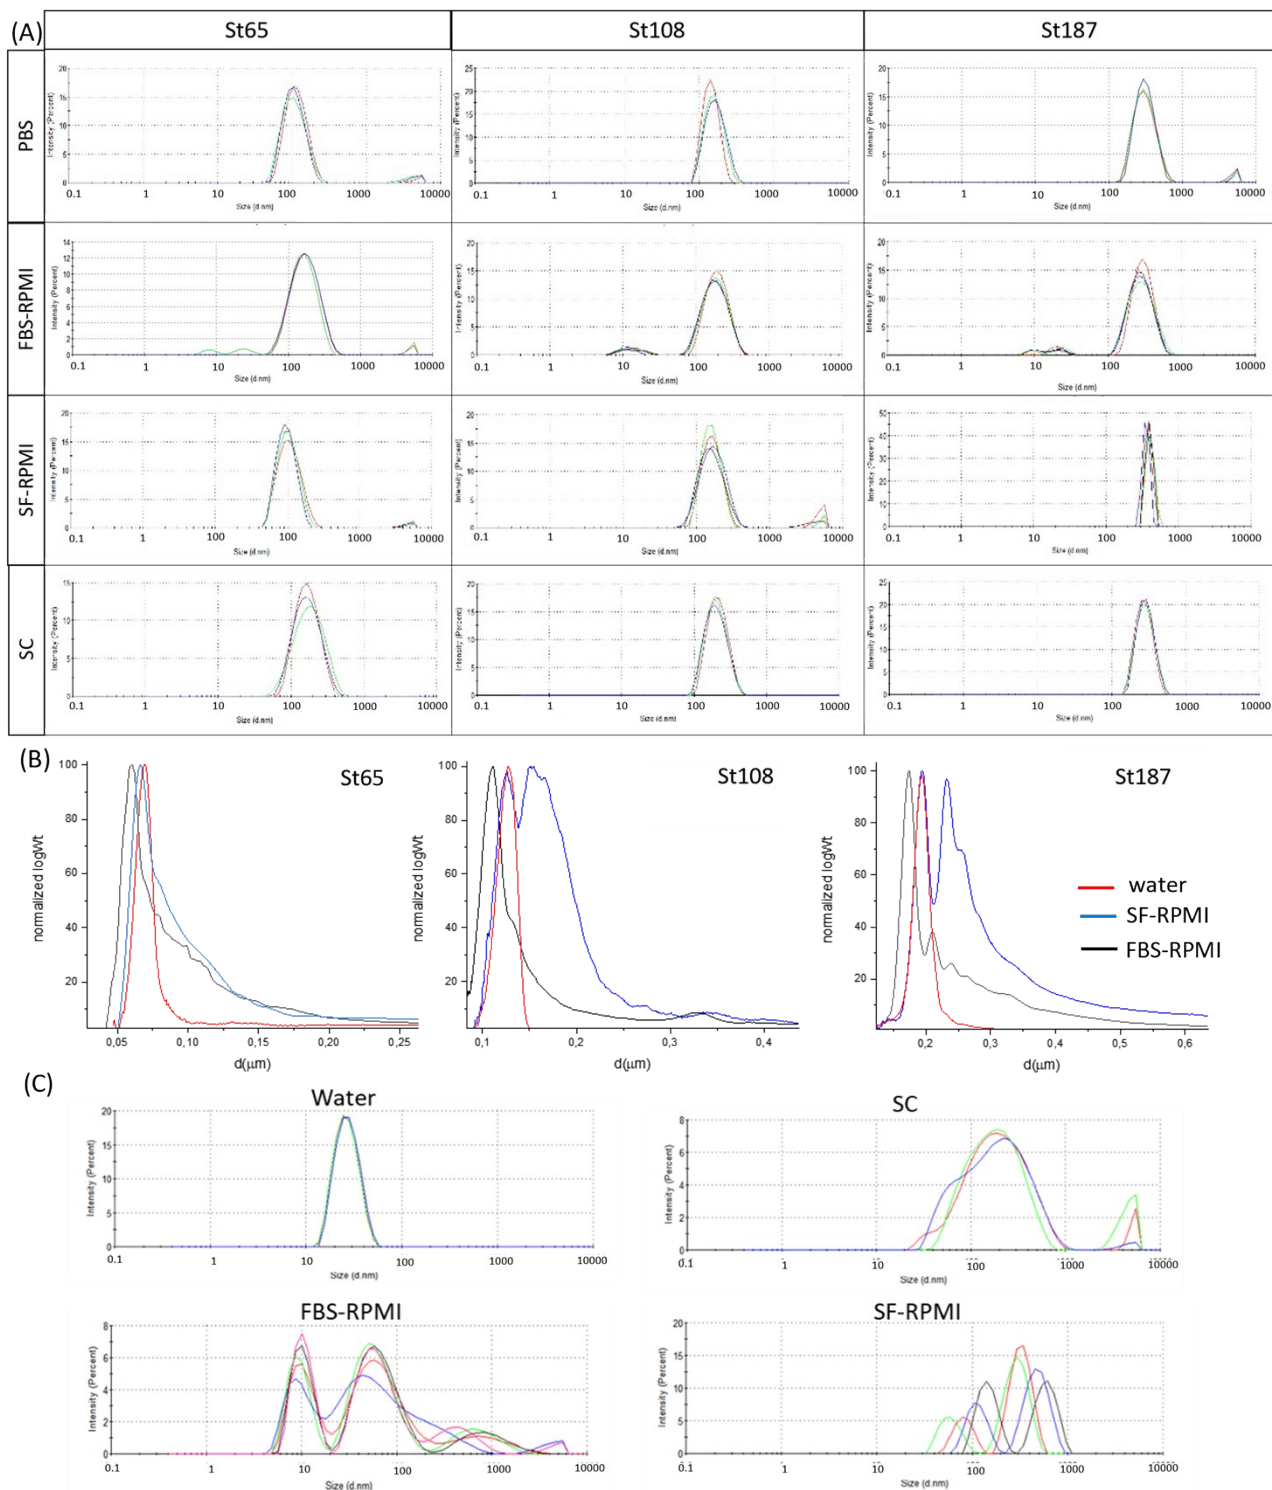

**Figure S3.** Analysis of stability of SiNPs dispersions in complex media. (A) DLS analysis of SiNPs in FBS-RPMI 1640 and SF-RPMI 1640, PBS and SC. All the reported plots refer to intensity distributions. (B) DCS plot of SiNPs in RPMI 1640 with and without FBS. (C) DLS of St20Com standard particles in FBS-RPMI 1640 and SF-RPMI 1640, PBS and SC.

**Table S3.** DCS and DLS analysis of St108 dispersed in different CCM with FBS and as serum free (SF). Peaks positions of DCS are reported along with Dh and PDI obtained from DLS.

| CCM         | FBS    |      |               | SF     |      |               |
|-------------|--------|------|---------------|--------|------|---------------|
|             | Dh(nm) | PDI  | DCS peak (nm) | Dh(nm) | PDI  | DCS peak (nm) |
| MEM         | 199    | 0.17 | 104           | 259    | 0.83 | 129           |
| HAM         | 209    | 0.12 | 110           | 163    | 0.11 | 129           |
| Mc Coy's 5A | 219    | 0.17 | 105           | 216    | 0.18 | 129           |
| RPMI        | 202    | 0.11 | 111           | 169    | 0.14 | 124           |

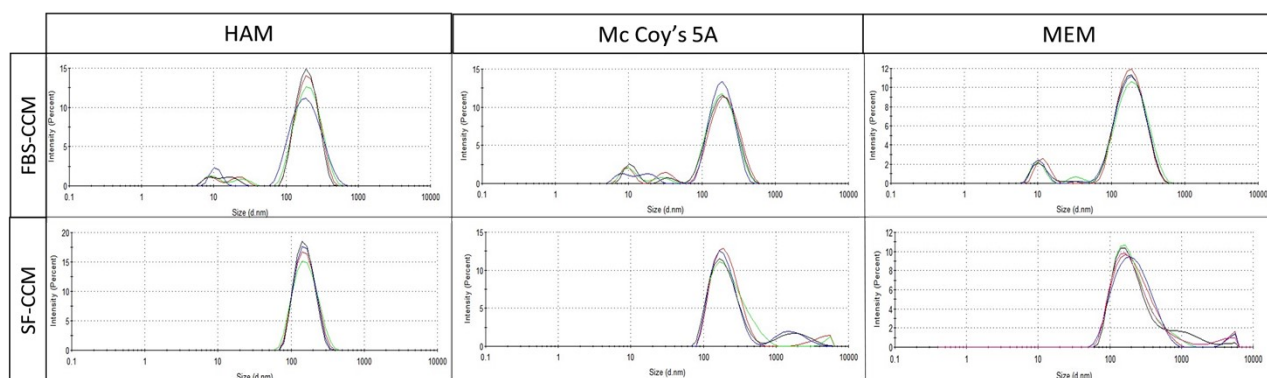

*Figure S4. DLS analysis of St108 samples dispersed in different CCM expressed as intensity plots.*



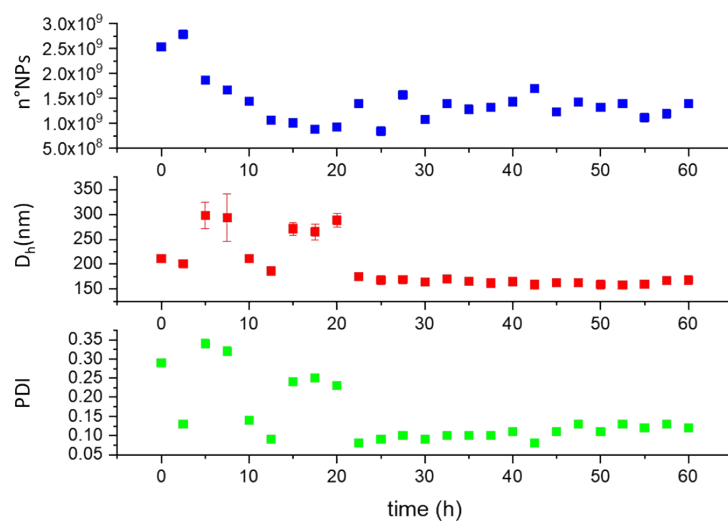

**Figure S5.** DLS analysis during time of St108 in Mc Coy's 5A. Particle counting ( $n^\circ$  NPs),  $D_h$  and PDI are reported as a function of time.

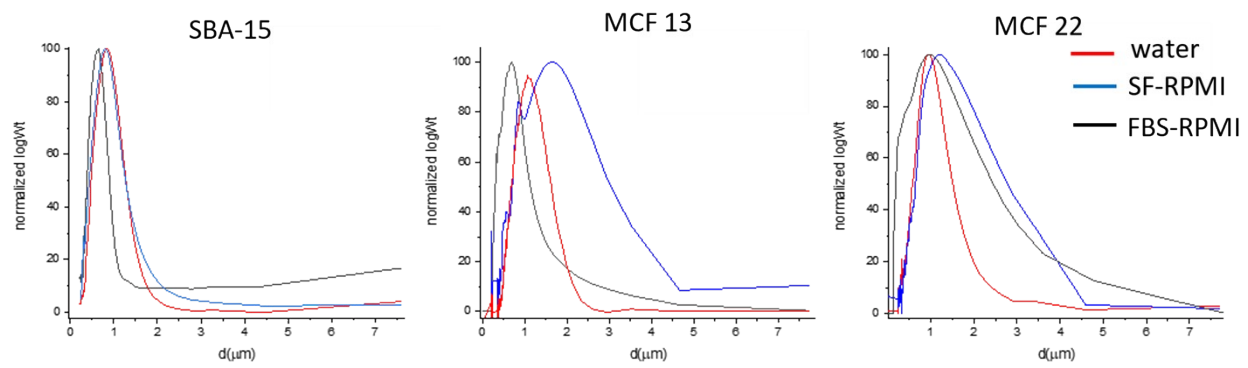

*Figure S6. DCS analysis of MSNs in water, FBS- RPMI and SF-RPMI.*

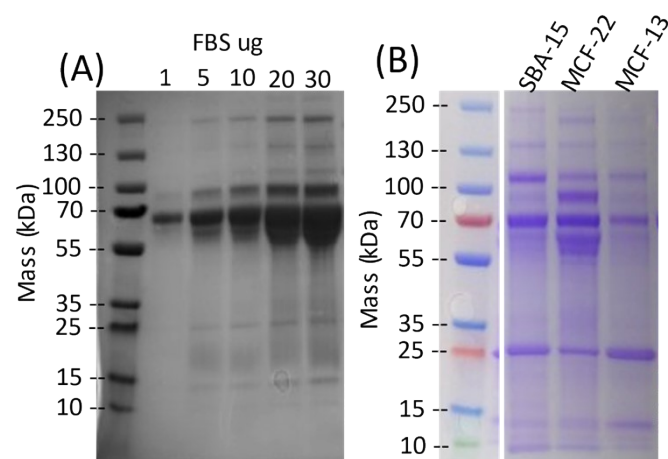

**Figure S7.** SDS-PAGE analysis. (A) FBS (from 1 to 30 ug) (B) MSN incubated with McCoy's5A with 10%FBS.

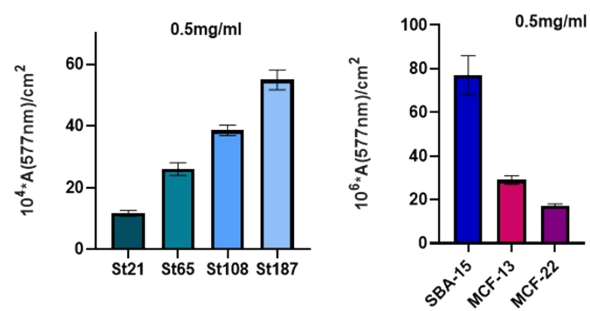

**Figure S8.** Hemolysis expressed as absorbance value normalized on NPs' surface area obtained at 0.5mg/ml of SiNPs on the left and MSN on the right. Errors correspond to  $\pm$  SD.

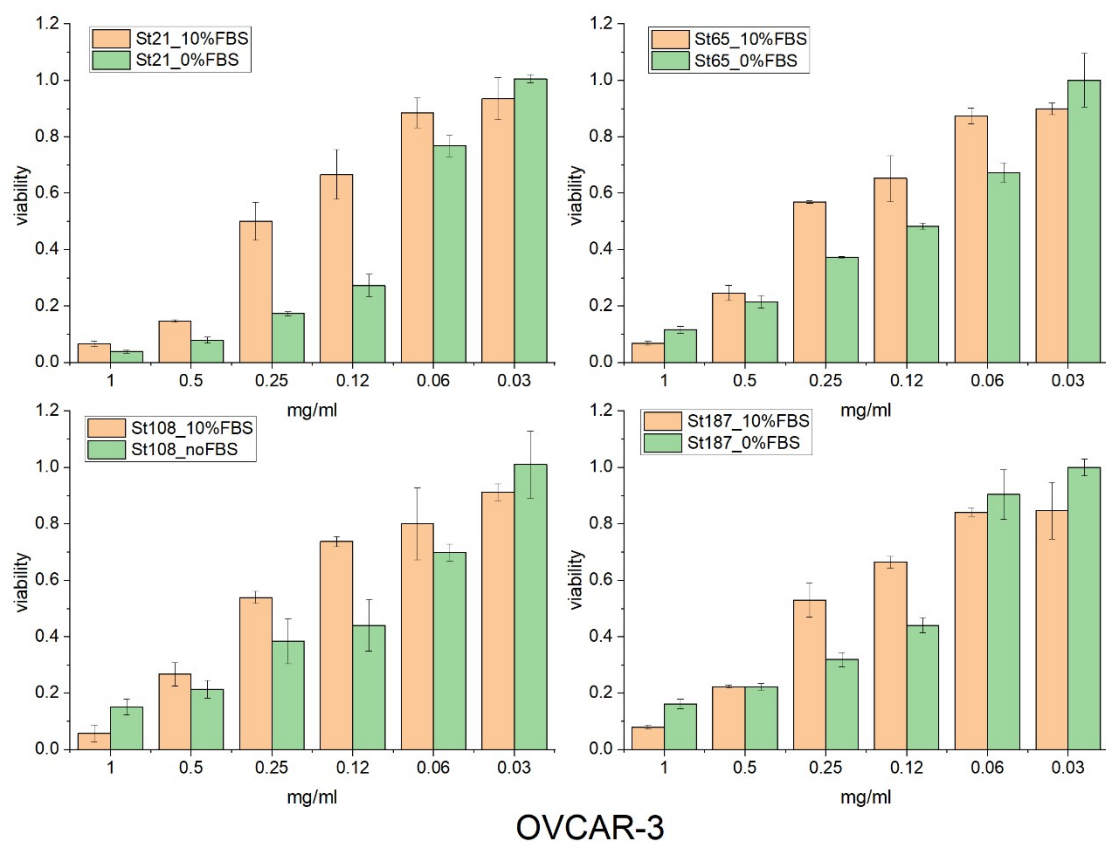

**Figure S9.** Bar plots of normalized viability values of OVCAR-3 exposed for 96 hours to SiNPs at different concentrations, both in presence and absence of FBS. Errors correspond to  $\pm$  SD.

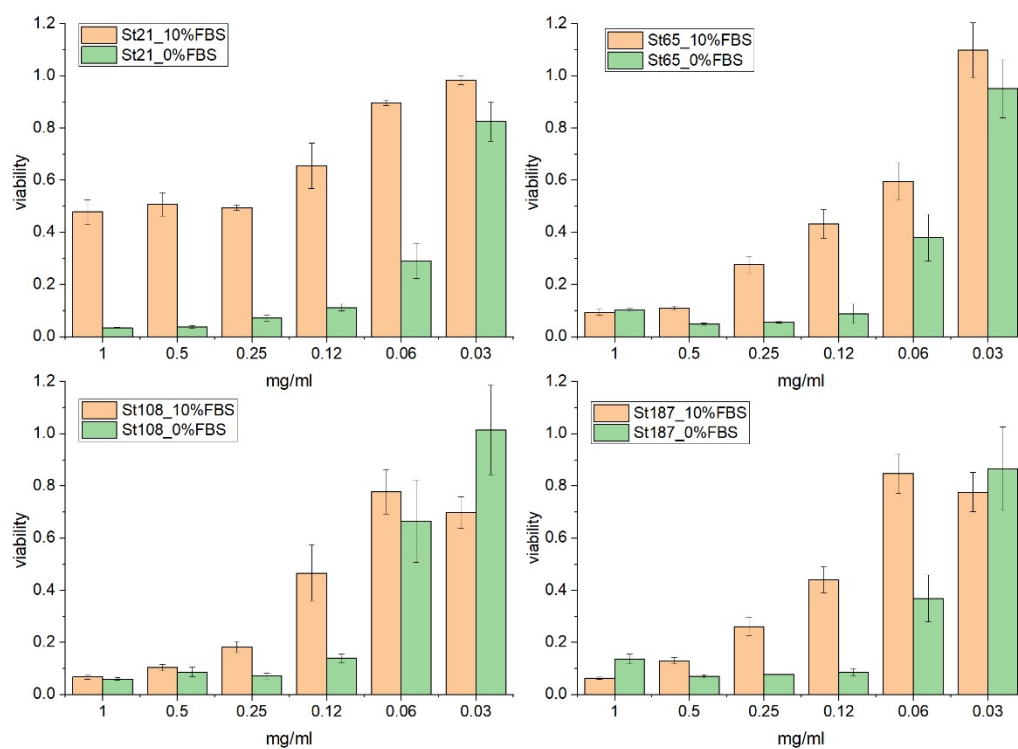

A549

*Figure S10. Bar plots of normalized viability values of A549 exposed for 96 hours to SiNPs at different concentrations, both in presence and absence of FBS. Errors correspond to  $\pm$  SD.*

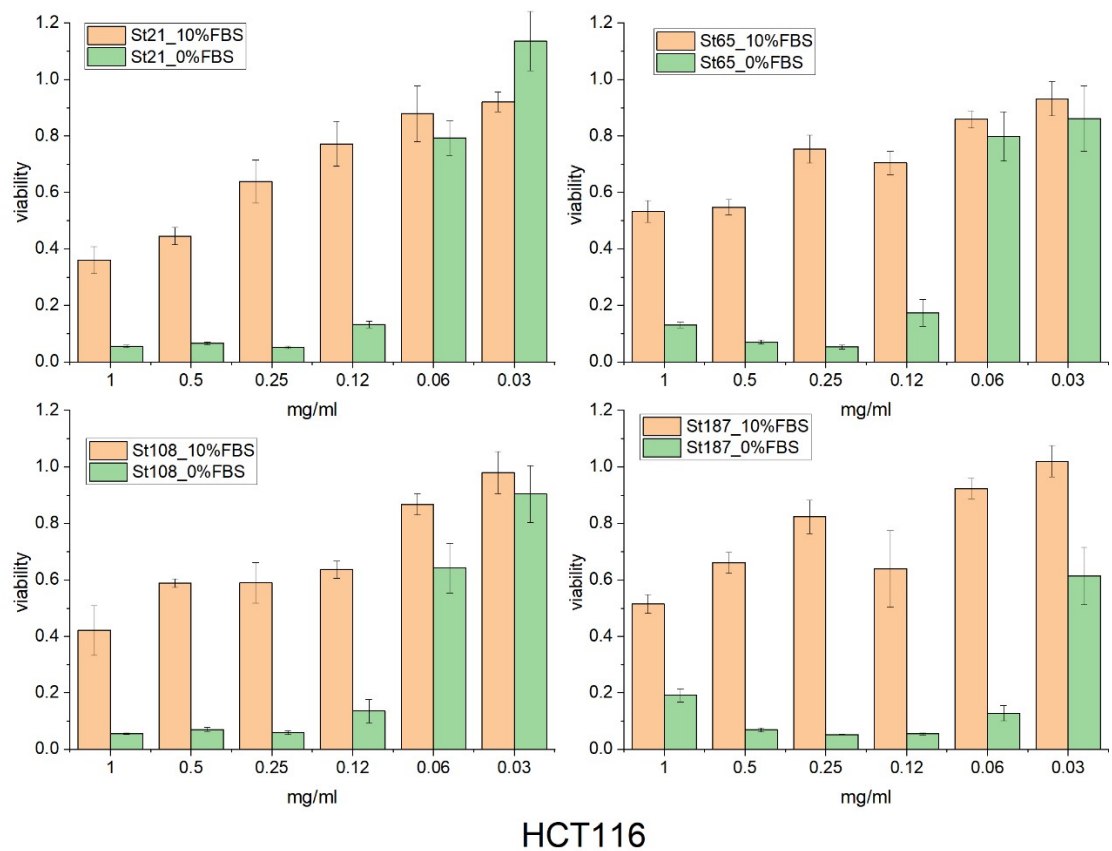

**Figure S11.** Bar plots of normalized viability values of HCT116 exposed for 96 hours to SiNPs at different concentration both in the presence and absence of FBS. Errors correspond to  $\pm$  SD.

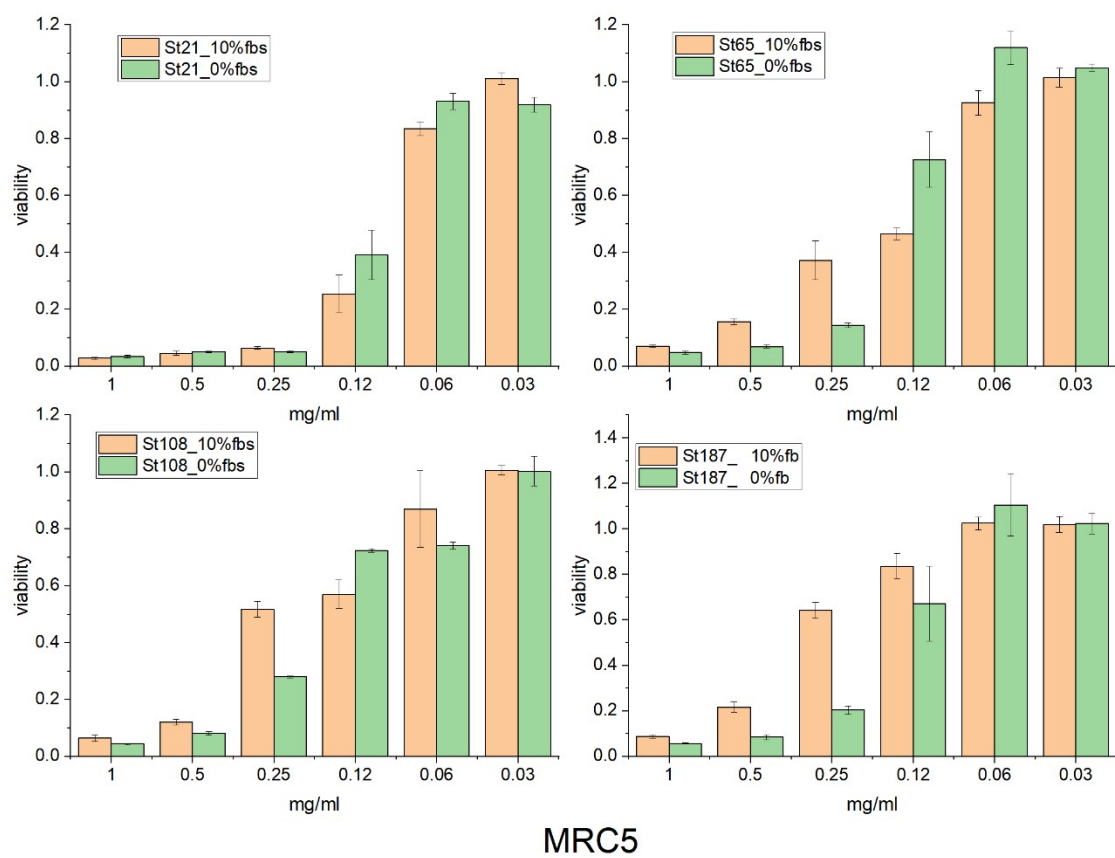

**Figure S12.** Bar plots of normalized viability values of MRC-5 exposed for 96 hours to SiNPs at different concentrations, both in presence and absence of FBS. Errors correspond to  $\pm$  SD.



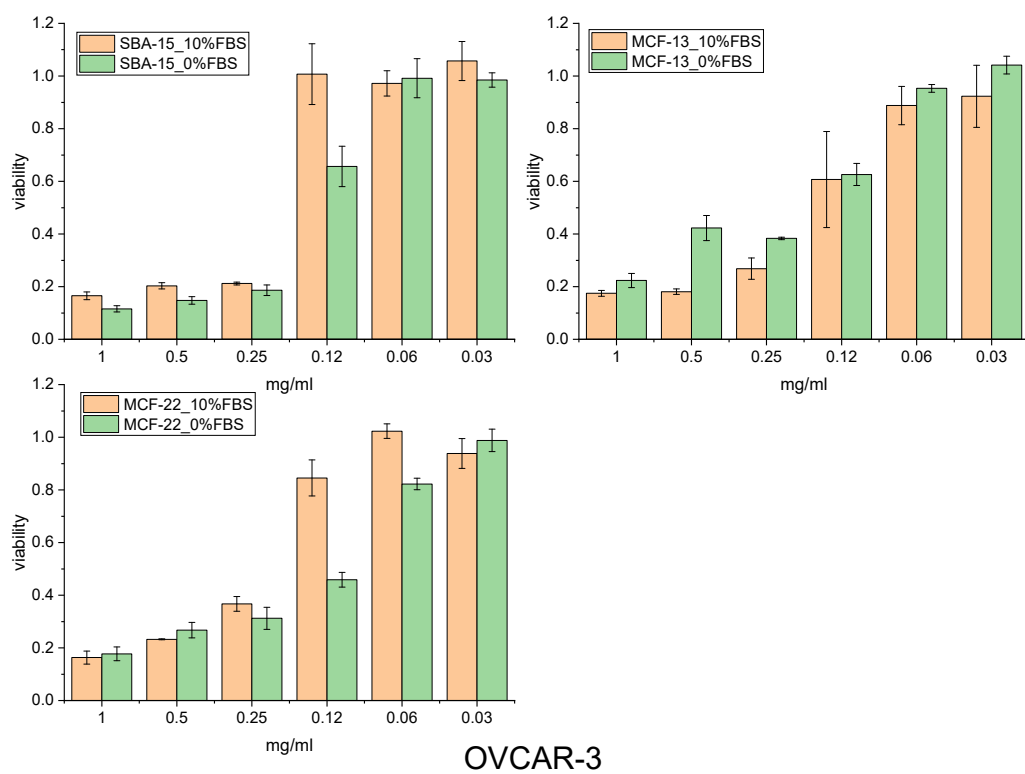

**Figure S13.** Bar plots of normalized viability values of OVCAR-3 exposed for 96 hours to MSN at different concentration, both in presence and absence of FBS. Errors correspond to  $\pm$  SD.

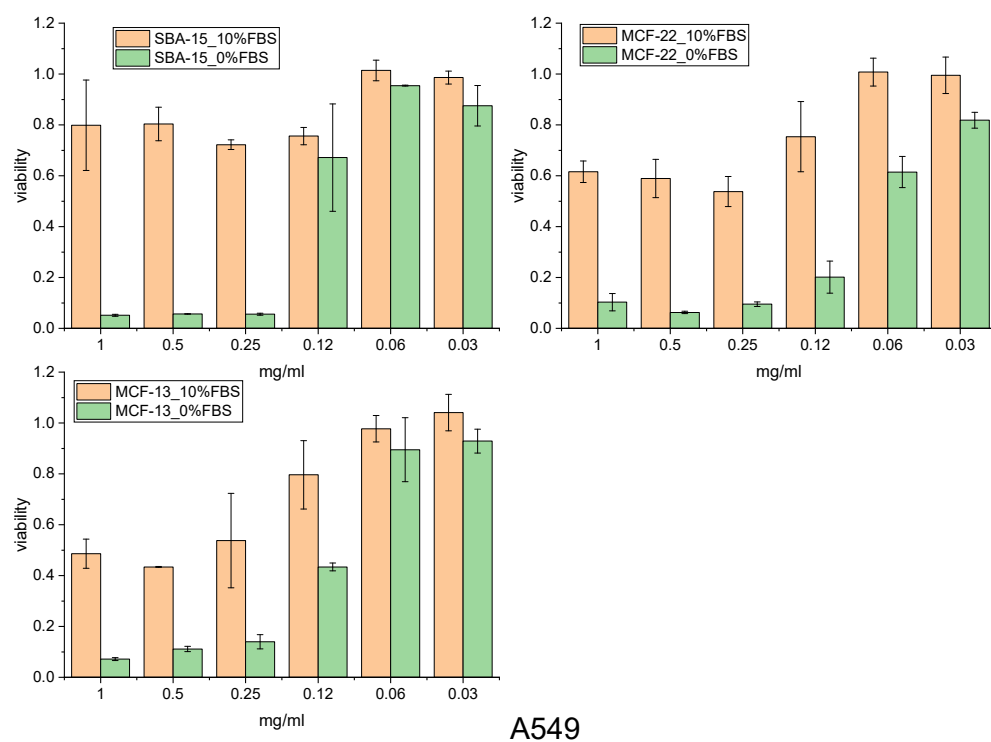

**Figure S14.** Bar plots of normalized viability values of A549 exposed for 96 hours to MSN at different concentrations, both in presence and absence of FBS. Errors correspond to  $\pm$  SD.

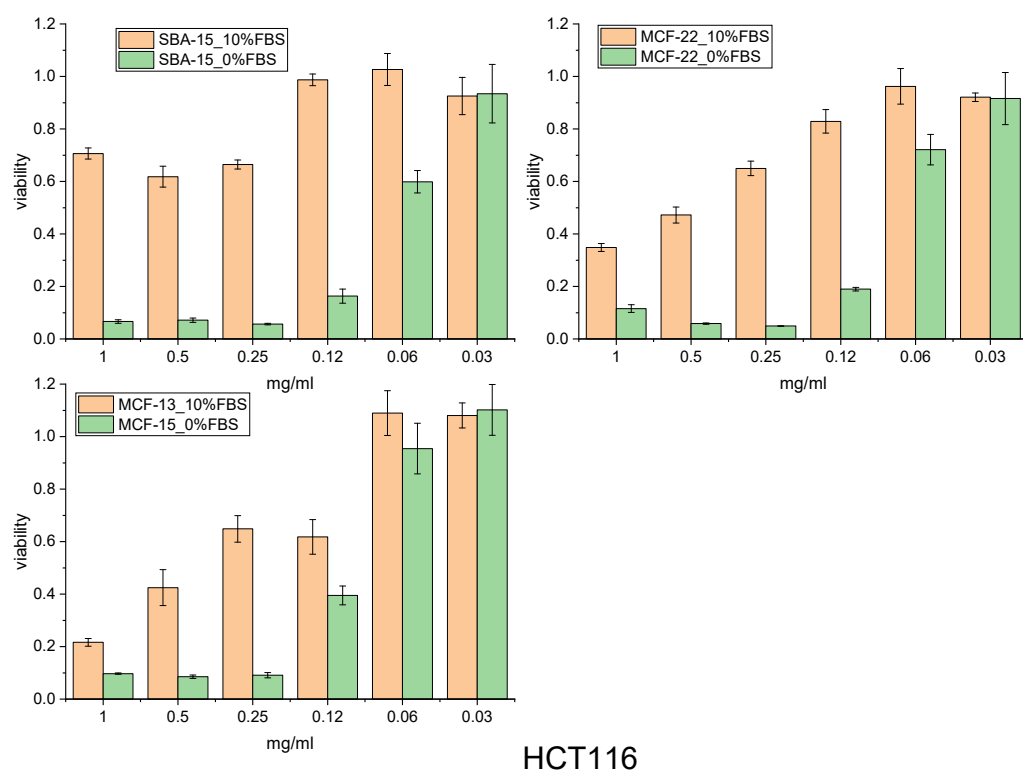

**Figure S15.** Bar plots of normalized viability values of HCT116 exposed for 96 hours to MSN at different concentration, both in presence and absence of FBS. Errors correspond to  $\pm$  SD.

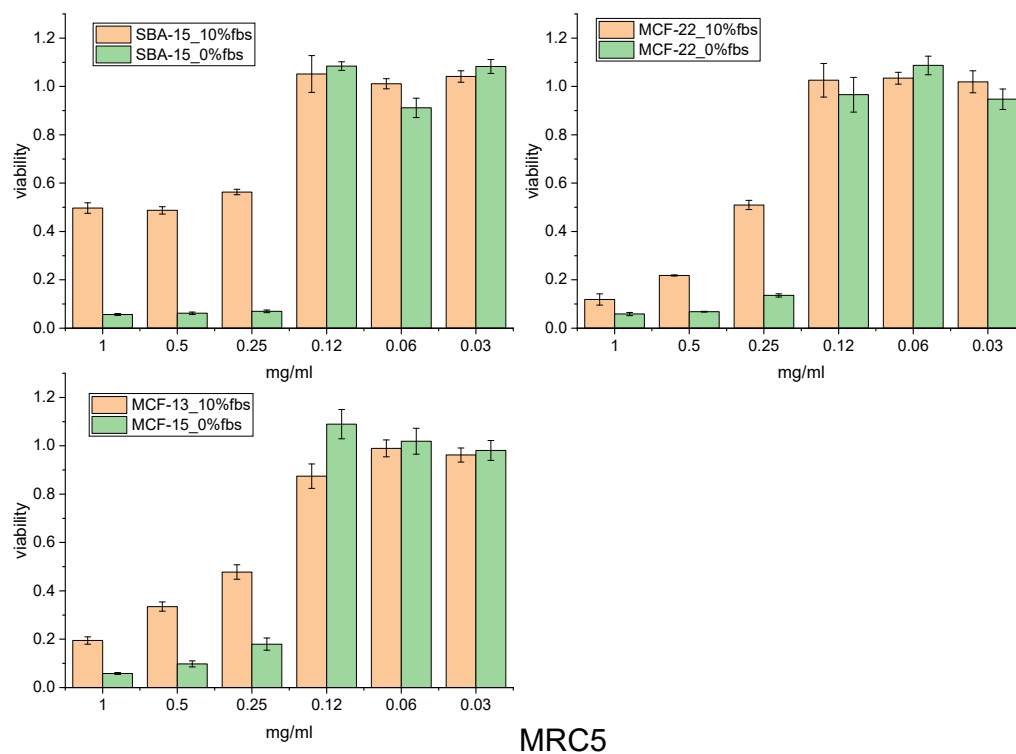

**Figure S16.** Bar plots of normalized viability values of MRC5 exposed for 96 hours to MSN at different concentrations, both in presence and absence of FBS. Errors correspond to  $\pm$  SD.

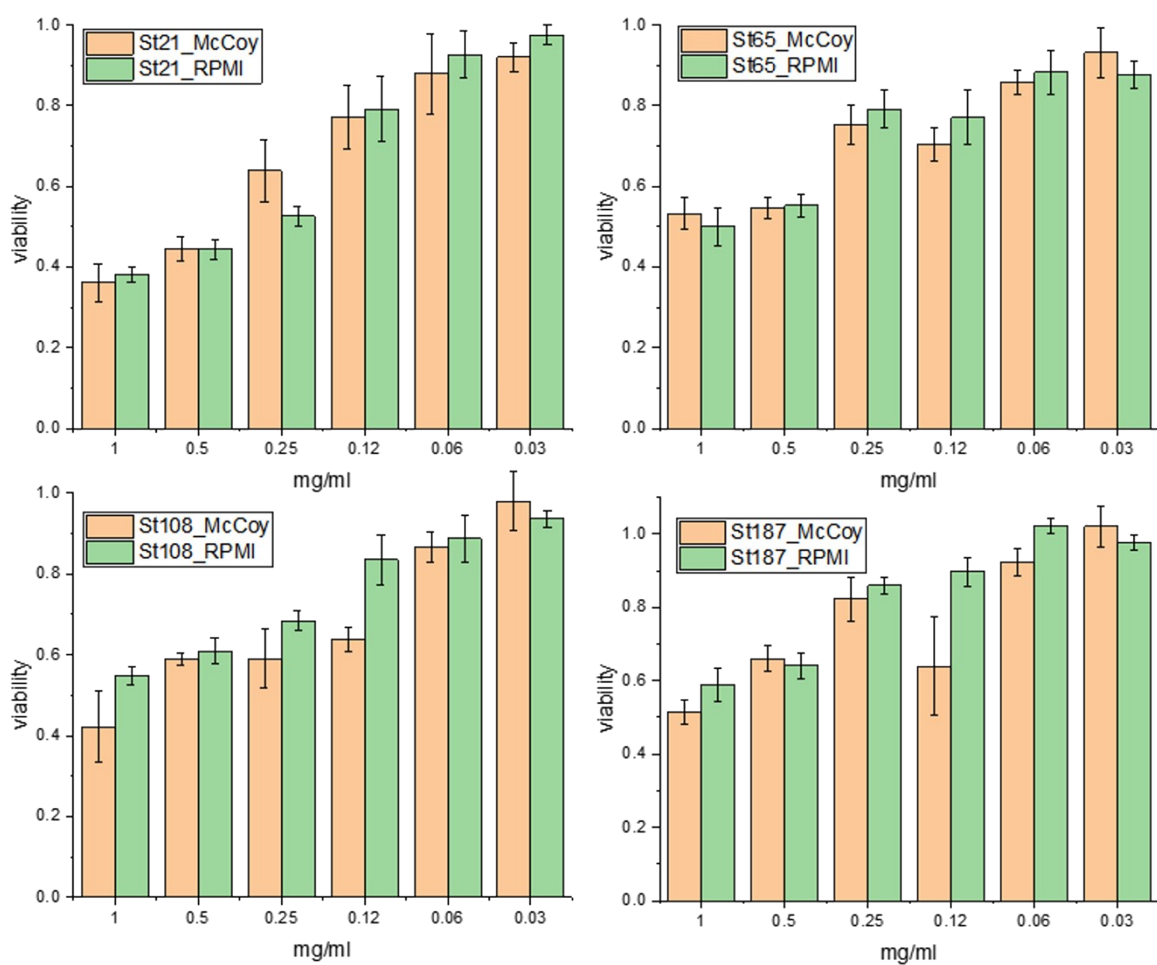

**Figure S17.** Bar plots of normalized viability values of HCT116 exposed for 96 hours to SiNPs, both in RPMI1640 and McCoy's 5A with 10% FBS. Errors correspond to  $\pm$  SD.

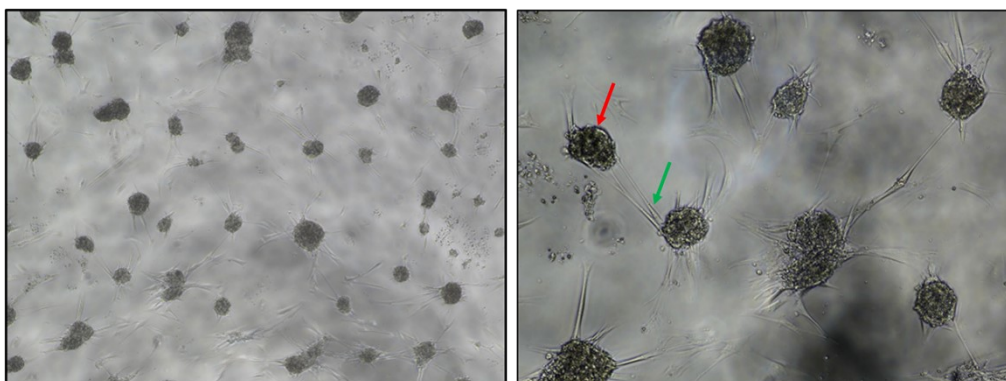

**Figure S18 .** Images of particles aggregation on MRC-5. MRC5 were exposed to 0.5mg/ml of MCF-13 for 96 hours in serum free condition (10x on the left and 20x on the right). Green arrow indicates fibroblast, red arrow indicates the aggregates of particles.

**Table S4.** *Inorganic salts composition of CCM*

| Inorganic Salts                                                                 | CCM (concentration reported as mM) |            |           |             |
|---------------------------------------------------------------------------------|------------------------------------|------------|-----------|-------------|
|                                                                                 | RPMI 1640                          | McCoy's 5A | MEM       | Ham's F-12  |
| Calcium nitrate (Ca(NO <sub>3</sub> ) <sub>2</sub> 4H <sub>2</sub> O)           | 0.42372882                         |            |           |             |
| Calcium Chloride (CaCl <sub>2</sub> ) (anhyd.)                                  |                                    | 0.9009009  | 1.8018018 | 0.2992793   |
| Magnesium Sulfate (MgSO <sub>4</sub> ) (anhyd.)                                 | 0.407                              | 0.8130081  | 0.8139166 | 0.6023158   |
| Potassium Chloride (KCl)                                                        | 5.3333335                          | 5.3333335  | 5.3333335 | 2.9813335   |
| Sodium Bicarbonate (NaHCO <sub>3</sub> )                                        | 23.809525                          | 26.190475  | 26.190475 | 14          |
| Sodium Chloride (NaCl)                                                          | 103.44827                          | 111.37931  | 117.24138 | 131.01724   |
| Sodium Phosphate dibasic (Na <sub>2</sub> HPO <sub>4</sub> ) (anhyd.)           | 5.633803                           | 4.2028985  |           | 1           |
| Sodium Phosphate monobasic (NaH <sub>2</sub> PO <sub>4</sub> -H <sub>2</sub> O) |                                    |            | 1.0144928 |             |
| Zinc sulfate (ZnSO <sub>4</sub> -7H <sub>2</sub> O)                             | x                                  | x          | x         | 0.002996528 |
| Ferric sulfate (FeSO <sub>4</sub> -7H <sub>2</sub> O)                           | x                                  | x          | x         | 0.003       |
| Cupric sulfate (CuSO <sub>4</sub> -5H <sub>2</sub> O)                           | x                                  | x          | x         | 1.00E-05    |
